# Supplementary material for: Phase transition and dewetting of a 5CB liquid crystal thin film on a topographically patterned substrate
Source: Royal Society of Chemistry journal article supplement (doi:10.1039/c9ra02552a), 2019-01-01
Supplement: c9ra02552a1.pdf [file c9ra02552a1.pdf]

## Phase Transition and Dewetting of 5CB Liquid Crystal Thin Film on Topographically Patterned Substrate

Palash Dhara and Rabibrata Mukherjee\*

Instability and Soft Patterning Laboratory, Department of Chemical Engineering, Indian Institute of Technology Kharagpur, Kharagpur, Pin-721302, India.

\*e-mail: [rabibrata@che.iitkgp.ac.in](mailto:rabibrata@che.iitkgp.ac.in)

### Supporting Information

#### S1: AFM images of the bare patterned PMMA substrates

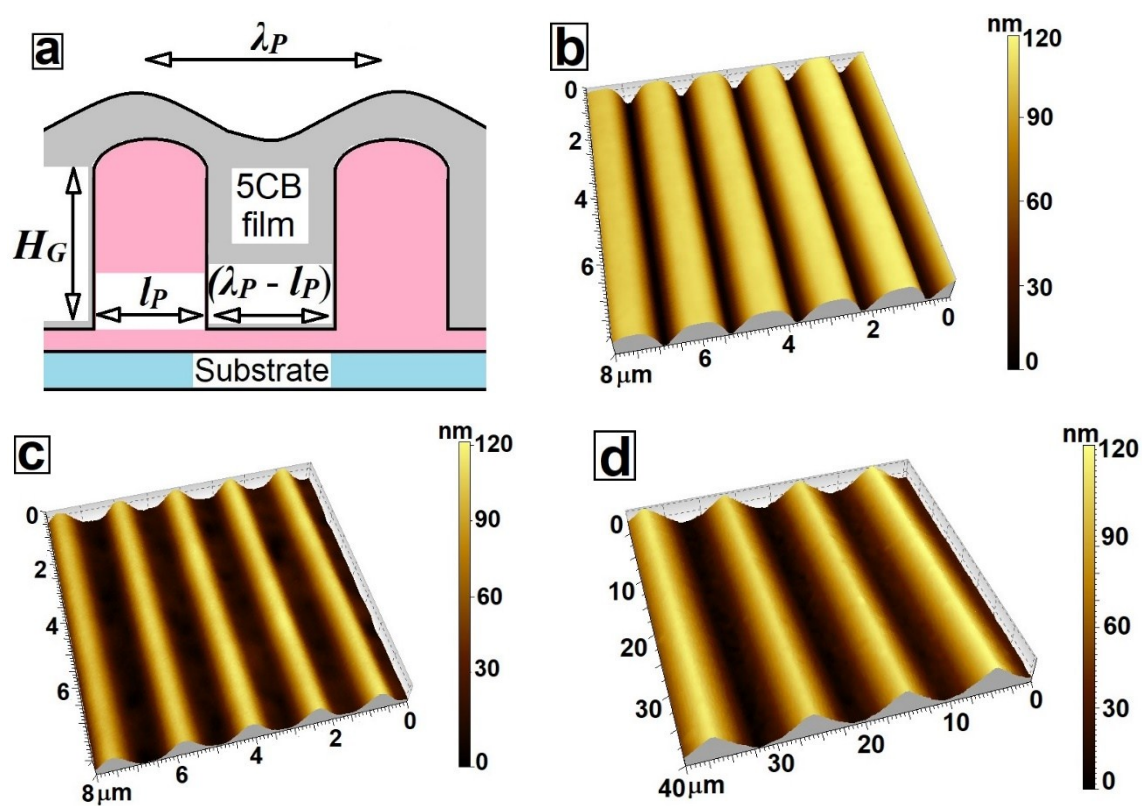

*S1: (a) Schematic of 5CB coated on patterned substrates with different nomenclatures. AFM images of bare PMMA patterned substrates of (b) Type 1A (c) Type 1B and (d) Type 2 substrates.*

**S2: Healing of dewetted structures of 5CB on PMMA substrate:**

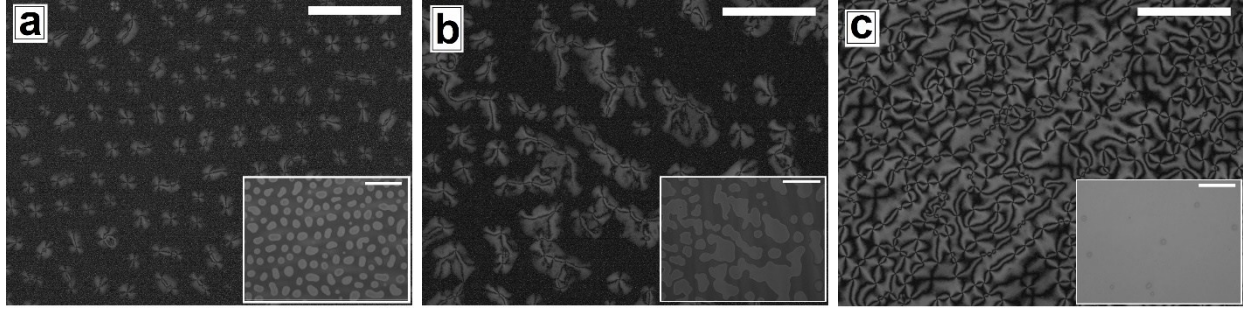

*S2: Polarized microscope images of (a) 5CB dewetted droplets on PMMA substrate. Spreading and healing of dewetted droplets at room temperature after (b) 15 hours and (c) 40 hours. Insets are bright field images. Scale bar 100  $\mu\text{m}$ .*

**S3: Calculation for  $h_{L1}$  and  $h_{L2}$  on Type 1A and 1B substrates:**

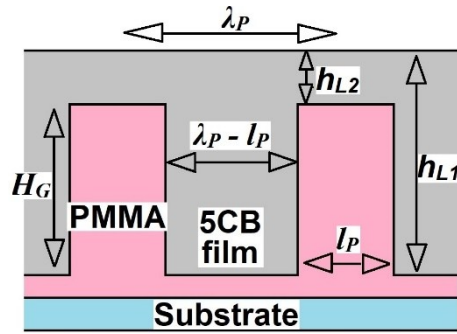

*Schematic with different nomenclatures for 5CB thin film coated on patterned substrate.*

From the mass balance, we get,

$$\{h_{L1} * (\lambda_p - l_p)\} + (h_{L2} * l_p) = h_E * (\lambda_p) \quad (i)$$

$$h_{L1} = h_{L2} + H_G \quad (ii)$$

Where,  $h_{L1}$  = Local thickness of the 5CB film on patterns grooves regions.

$h_{L2}$  = Local film thickness on patterns stripes regions.

$\lambda_p$  = Patterned periodicity.

$l_p$  = Line width.

$(\lambda_p - l_p)$  = Groove width.

$H_G$  = Groove depth.

$h_E$  = Effective film thickness

Now, for **Type 1A** substrates:

$$\lambda_P = 1.5 \mu\text{m}$$

$$l_P = 900 \text{ nm}$$

$$(\lambda_P - l_P) = 600 \text{ nm}$$

$$H_G = 120 \text{ nm}$$

$$h_E = 132 \text{ nm}$$

$$\{h_{L1} * (\lambda_P - l_P)\} + (h_{L2} * l_P) = h_E * (\lambda_P) \quad (\text{i})$$

$$h_{L1} = h_{L2} + H_G \quad (\text{ii})$$

Putting equation (ii) into equation (i), we get,

$$\{(h_{L2} + H_G) * (\lambda_P - l_P)\} + (h_{L2} * l_P) = h_E * (\lambda_P) \quad (\text{iii})$$

Putting all the value,

We get,

$$h_{L2} = 84 \text{ nm} \ \& \ h_{L1} = 204 \text{ nm}.$$

Similarly, for **Type 1B** substrates:

$$\lambda_P = 1.5 \mu\text{m}$$

$$l_P = 400 \text{ nm}$$

$$(\lambda_P - l_P) = 1100 \text{ nm}$$

$$H_G = 120 \text{ nm}$$

$$h_E = 132 \text{ nm}$$

Putting the values into equation (i) and (ii),

We get,

$$h_{L2} = 44 \text{ nm} \ \& \ h_{L1} = 164 \text{ nm}.$$
